# Supplementary material
Source: PubMed Central journal article supplement (PMC4593890)
Supplement: Supp_Fig1.pdf [file Supp_Fig1.pdf]

## Supplementary Data

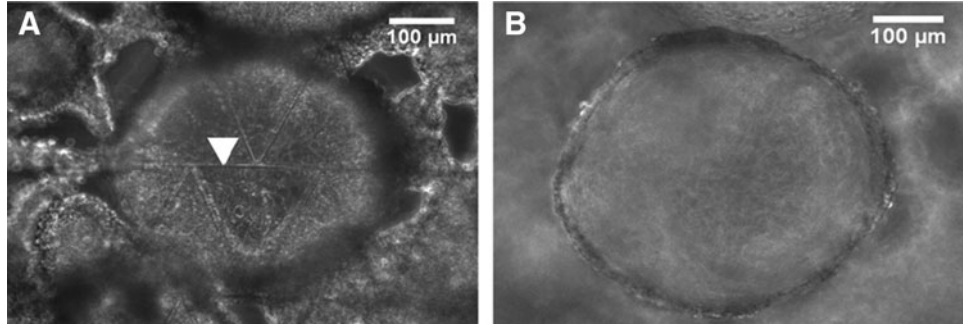

**SUPPLEMENTARY FIG. S1.** Phase contrast images of cysts formed on a mesh sheet by differentiated hiPS cells. **(A)** A bubble-like cyst so transparent that underlying mesh strand could be seen (*white arrow head*). **(B)** A phase contrast image of the same cyst as in **(A)** but at a different focal plane showing a clear interior cavity and a thin enclosing wall.
