# Supplementary material
Source: PubMed Central journal article supplement (PMC4593890)
Supplement: Supp_Fig2.pdf [file Supp_Fig2.pdf]

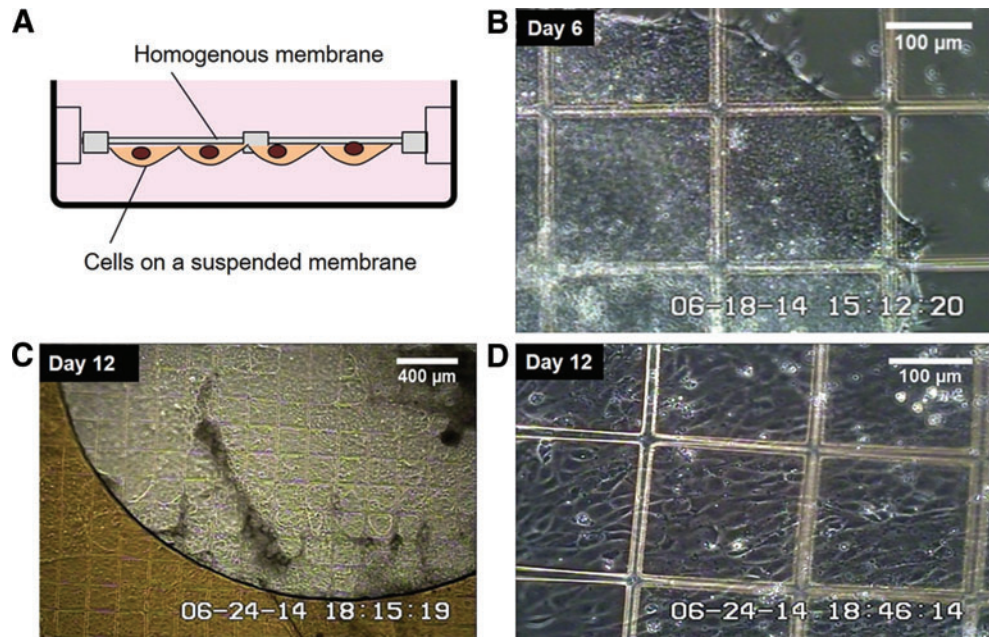

**SUPPLEMENTARY FIG. S2.** Results of a comparative experiment involving suspension culture of hiPS cells on a homogenous (nonmesh) thin membrane reinforced with *square grids* to demonstrate that differentiation on mesh occurred as a result of minimization of cell-substrate adhesion. **(A)** A schematic representation of how hiPSs were cultured on a thin homogenous membrane suspended in a culture medium. Cells were first seeded on the surface of the membrane facing up and then the membrane was turned upside down so that cells were on the lower surface as illustrated. **(B)** A phase contrast image of hiPSCs cultured on a homogenous membrane at day 6 and **(C)** day 12. **(D)** A phase contrast image showing differentiated cells of unconfirmed identity at day 12. hiPSCs cultured on the homogenous thin membrane did not form cysts, in contrast to cells cultured on suspended mesh sheets. hiPSCs, human pluripotent stem cells.
