# Supplementary material
Source: PubMed Central journal article supplement (PMC4593890)
Supplement: Supp_Fig3.pdf [file Supp_Fig3.pdf]

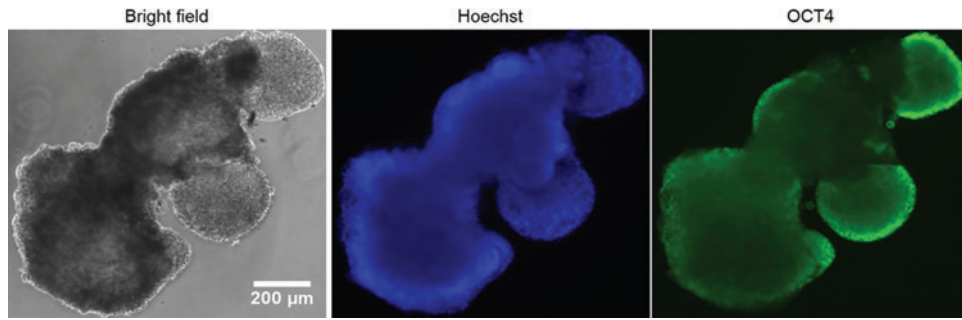

**SUPPLEMENTARY FIG. S3.** EBs formed by suspension culture in E8 medium at day 15. Images were obtained by immunofluorescence microscopy and show pronouncedly high expression of OCT4 along the peripheries. In contrast to cysts of TLCs, EBs lacked the clear interior cavity and were much darker. E8 medium, essential 8 medium; EBs, embryonic bodies; TLCs, trophoblast lineage cells.
