# Supplementary material
Source: PubMed Central journal article supplement (PMC4593890)
Supplement: Supp_Fig4.pdf [file Supp_Fig4.pdf]

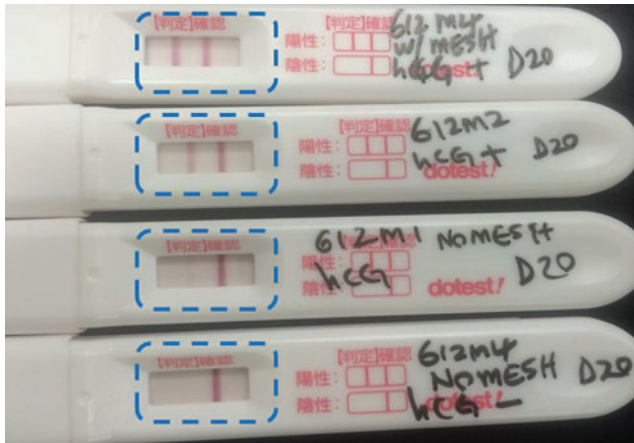

**SUPPLEMENTARY FIG. S4.** Test of hCG hormone secretion in the culture medium using over-the-counter pregnancy testers. hCG hormone secretion was assayed in media collected from mesh culture and EB culture samples. All medium from mesh culture with TLC cysts tested positive for hCG hormone, whereas media with EBs tested negative. Test was performed at day 20 of culture. A *double line* at the region marked with a *dotted blue line* indicates a positive result while a *single line* indicates a negative result. hCG, human chorionic gonadotropin.
