# Supplementary material
Source: PubMed Central journal article supplement (PMC4593890)
Supplement: Supp_Fig5.pdf [file Supp_Fig5.pdf]

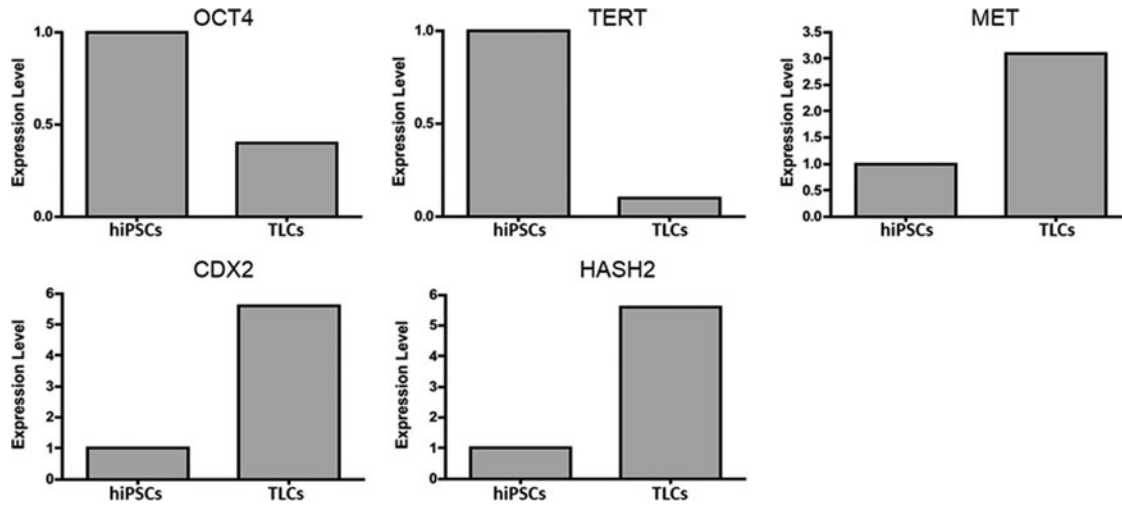

**SUPPLEMENTARY FIG. S5.** Expression of pluripotency and differentiation markers in mesh-generated TLCs as compared to control hiPSCs cultured on a typical culture dish coated with laminin. Expression levels were determined by real-time polymerase chain reaction relative to GAPDH. In addition to OCT4, TERT, MET, and CDX2, we also analyzed HASH2 (also known as ASCL2) as a differentiation marker. Although the expression of pluripotency markers (OCT4 and TERT) was lower in TLCs, these cells showed a relatively high expression of differentiation markers (MET, CDX2, and HASH2) compared with control hiPSCs.
